# Supplementary material
Source: Springer Nature journal article supplement (https://www.springermedizin.de/resource/supplementary/12885_2011_3111_MOESM2_ESM.pdf/9464218)

**A**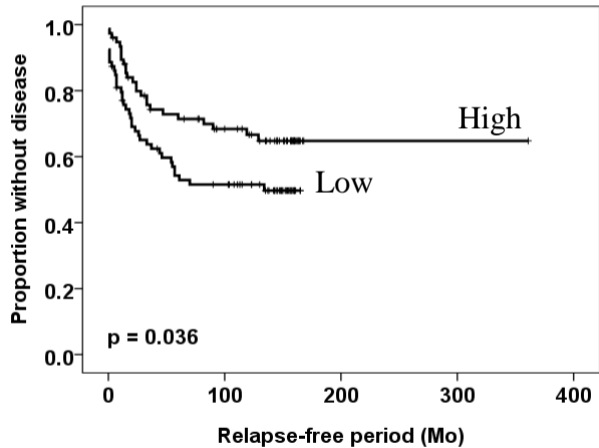**B**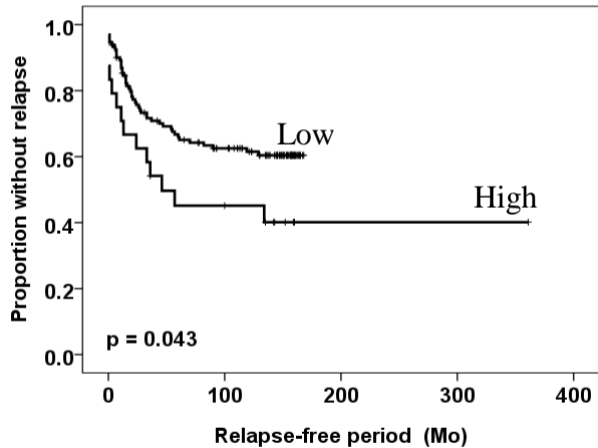

Supplement: MOESM2 [file 9464218]
